1 **Circadian key component CLOCK/BMAL1 interferes with segmentation clock in mouse**  
2 **embryonic organoids**

3

4 **Authors:** Yasuhiro Umemura<sup>a</sup>, Nobuya Koike<sup>a</sup>, Yoshiki Tsuchiya<sup>a</sup>, Hitomi Watanabe<sup>b</sup>, Gen  
5 Kondoh<sup>b</sup>, Ryoichiro Kageyama<sup>c</sup>, and Kazuhiro Yagita<sup>a,\*</sup>.

6 **Affiliations:**

7 <sup>a</sup>Department of Physiology and Systems Bioscience, Kyoto Prefectural University of Medicine,  
8 Kawaramachi-Hirokoji, Kyoto 602-8566, Japan.

9 <sup>b</sup>Laboratory of Integrative Biological Science, Institute for Frontier Life and Medical Sciences,  
10 Kyoto University, Kyoto 606-8501, Japan.

11 <sup>c</sup>Laboratory of Growth Regulation System, Institute for Frontier Life and Medical Sciences, Kyoto  
12 University, Kyoto 606-8507, Japan.

13 \*Correspondence to: Kazuhiro Yagita

14 **Email:** [kyagita@koto.kpu-m.ac.jp](mailto:kyagita@koto.kpu-m.ac.jp)

15 **Author Contributions:** Y.U. and K.Y. designed the research; Y.U., Y.T., H.W., G.K., and K.Y.  
16 performed the research; Y.U., N.K., Y.T., R.K., and K.Y. analyzed the data; Y.U., N.K., and K.Y.  
17 wrote the paper

18 **Competing Interest Statement:** The authors declare no competing interests

## 19 **Abstract**

20 In mammals, circadian clocks are strictly suppressed during early embryonic stages as well as  
21 pluripotent stem cells, by the lack of CLOCK/BMAL1 mediated circadian feedback loops. During  
22 ontogenesis, the innate circadian clocks emerge gradually at a late developmental stage, then, with  
23 which the circadian temporal order is invested in each cell level throughout a body. Meanwhile, in  
24 the early developmental stage, a segmented body plan is essential for an intact developmental  
25 process and somitogenesis is controlled by another cell-autonomous oscillator, the segmentation  
26 clock, in the posterior presomitic mesoderm (PSM). In the present study, focusing upon the  
27 interaction between circadian key components and the segmentation clock, we investigated the  
28 effect of the CLOCK/BMAL1 on the segmentation clock *Hes7* oscillation, revealing that the  
29 expression of functional CLOCK/BMAL1 severely interferes with the ultradian rhythm of  
30 segmentation clock in induced PSM and gastruloids. RNA sequencing analysis showed that the  
31 premature expression of CLOCK/BMAL1 affects the *Hes7* transcription and its regulatory  
32 pathways. These results suggest that the suppression of CLOCK/BMAL1-mediated transcriptional  
33 regulation during the somitogenesis may be inevitable for intact mammalian development.

34

## 35 **Introduction**

36 The circadian clock is the cell-autonomous time-keeping system generating the orderly regulated  
37 various physiological functions, which enables cells, organs, and systems to adapt to the cyclic  
38 environment of the rotating Earth (1-5). The core architecture of the circadian molecular clock  
39 consists of negative transcriptional/translational feedback loops (TTFLs) composed of a set of  
40 circadian clock genes, including *Bmal1*, *Clock*, *Period* (*Per1*, 2, 3), and *Cryptochrome* (*Cry1*, 2),  
41 functioning under the control of E-box elements (2, 6). The kernel of TTFLs is composed of  
42 heterodimerized CLOCK/BMAL1 key transcriptional factors that positively regulate the circadian  
43 output genes, as well as *Per* and *Cry* genes via E-box. PERs and CRYs inhibit CLOCK/BMAL1  
44 transcriptional activity, and the negative feedback loops between these genes generate oscillations  
45 of approximately 24 hr.

46 In mammalian development, it has been demonstrated that early embryos and pluripotent  
47 stem cells have no apparent circadian molecular oscillations (7-11), whereas the innate circadian  
48 clock develops during ontogenesis and is established at a late developmental stage (12-15).  
49 Regarding the mechanisms regulating circadian clock development, using an *in vitro* model of  
50 embryonic stem cell (ESC) differentiation and mouse embryos, it was shown that prolonged  
51 posttranscriptional mechanisms, such as suppressed translation of CLOCK protein and

52 predominant cytoplasmic localization of PER proteins, inhibit the establishment of the circadian  
53 TTFL cycle (16-18). Although it was revealed that the multiple mechanisms strictly suppress the  
54 circadian molecular clock in the undifferentiated cells and early stage embryos, the biological and  
55 physiological significance of the delayed emergence of circadian clock oscillation in mammalian  
56 embryos has been unknown.

57 In the early developmental stages, a segmented body plan is essential for an intact  
58 developmental process. Somitogenesis is related to another cell-autonomous oscillator, the  
59 segmentation clock, in the posterior presomitic mesoderm (PSM) (19, 20). The mouse  
60 segmentation clock is underlain by a negative feedback loop involving *Hes7* oscillation (21, 22).  
61 HES7 is a key transcriptional factor that represses its own expression and oscillates through a  
62 negative feedback loop in a period of 2–3 hr in mouse and 4–5 hr in humans. The NOTCH, WNT,  
63 and fibroblast growth factor signaling pathways are involved in the regulation of the *Hes7*  
64 oscillator and its intercellular synchronization (20). In mammals, two different types of rhythm  
65 sequentially emerge during the developmental process, however, there is a lack of knowledge  
66 about the biological significance of the rhythm conversion during development.

67 In this study, focusing on the relationship between circadian clock and segmentation clock,  
68 we investigated the effect of the premature expression of CLOCK/BMAL1 on the segmentation  
69 clock oscillation, and revealed severe interference with the ultradian rhythm of segmentation clock  
70 in iPSM and gastruloids. RNA sequencing analysis showed that CLOCK/BMAL1 affects the *Hes7*  
71 transcription and its regulatory pathways. These findings highlight that the suppression of  
72 functional CLOCK/BMAL1, which leads to arrest the circadian clock oscillation, during the early  
73 to mid-developmental stage may be inevitable for the intact process of mammalian embryogenesis.

74

75

76

## 77 **Results**

### 78 **A circadian clock gene, *Per1*, and a segmentation clock gene, *Hes7*, are adjacent genes in the** 79 **mammalian genome**

80 In mammals, the temporal relationship between the segmentation clock and circadian clock  
81 appears to be mutually exclusive (**Fig. S1**) (12-15, 19, 20). To explore the functional interaction  
82 between these two biological rhythms with different frequencies during the developmental process,

83 we focused on the genomic architecture of genes comprising circadian and segmentation clocks,  
84 respectively. Intriguingly, one of the core circadian clock genes, *Per1*, is physically adjacent to an  
85 essential component of the segmentation clock, *Hes7*, in a genomic region conserved in higher  
86 vertebrates, including mice and humans. The *Per1* homolog *Per2* is adjacent to the *Hes7* homolog  
87 *Hes6* in the genome (**Fig. 1A**). Since *Hes7* exhibits the essential characteristics of a segmentation  
88 clock (23) and neighboring genes can influence the expressions with each other during  
89 somitogenesis in zebrafish (24), we focused on the effect of the regulation mechanism of the  
90 circadian clock on segmentation clock oscillation. Therefore, we investigated the effect of the  
91 CLOCK/BMAL1-mediated activation of *Per1* transcription on the segmentation clock oscillation  
92 in induced presomitic mesoderm (iPSM), an *in vitro* recapitulating model of a segmentation clock,  
93 using ESCs carrying the *Hes7*-promoter-driven luciferase reporter (*pHes7-luc*) (25) (**Fig. 1B**). In  
94 the iPSM, the pluripotent markers have not yet been down-regulated sufficiently as previously  
95 reported (25), and the iPSM differentiated from *Per2<sup>Luc</sup>* ESCs showed no apparent circadian clock  
96 oscillation (**Fig. S2A and B**). In addition, the immunostaining pattern of CLOCK, BMAL1, and  
97 PER1 in the iPSMs was quite similar to that in the undifferentiated ESCs (**Fig. S2C**) (16, 17),  
98 confirming that the circadian TTFL was not established and circadian clock oscillation was also  
99 strictly suppressed in the iPSM by the common inhibitory molecular mechanisms to the  
100 undifferentiated ESCs.

101 Because CLOCK/BMAL1 is key transcription regulator of circadian TTFL, and the  
102 expression of CLOCK protein is suppressed post-transcriptionally in iPSM as well as ESCs and  
103 early embryos (17), we established two ESC lines carrying both the doxycycline (dox)-inducible  
104 *Clock* and *Bmal1* genes (**Fig. 1C, Fig. S3**). In iPSM differentiated from ESCs, the expression of  
105 both *Clock/Bmal1* mRNA and CLOCK/BMAL1 proteins was confirmed after the addition of dox  
106 (**Fig. 1 D and E**), and we found that overexpression of both *Clock* and *Bmal1* successfully  
107 activated the expression of core clock genes (**Fig. 2A**). As the dominant negative mutant of *Bmal1*  
108 (*Bmal1DN*) (26) co-expressed with *Clock* did not activate the *Per1/2* and *Cry1/2* genes, we  
109 concluded that CLOCK/BMAL1 specifically activated the expression of these clock genes via an  
110 E-box (**Fig. 1 C–E, 2A**). We then examined the expression of genes in *Hes7*, which is proximal to  
111 *Per1*, and *Hes6*, which is proximal to *Per2* in the genome. The expression of *Clock/Bmal1* induced  
112 by dox in the iPSM induced significant upregulation of the expression of the *Hes7*, but not *Hes6*,  
113 gene (**Fig. 2B**). Similarly, we also observed the upregulation of *Hes7* expression by *Clock/Bmal1*  
114 induction in the undifferentiated ESCs (**Fig. S4 A and B**). These results indicate that the circadian  
115 components CLOCK/BMAL1 also affect the segmentation clock gene *Hes7*, as well as *Per1*.

116

## 117 **Inhibition of *Hes7* ultradian rhythm by CLOCK/BMAL1 in iPSM**

118 We next performed a functional analysis using the *in vitro* recapitulation model of a  
119 segmentation clock oscillation in iPSM (25). The oscillations in bioluminescence from *pHes7-luc*  
120 reporters were observed using a photomultiplier tube device (PMT) and an EM-CCD camera (**Fig.**  
121 **3A**). We confirmed an oscillation of *Hes7*-promoter-driven bioluminescence with a period of  
122 approximately 2.5–3 hr in control iPSM with or without dox using PMT and the EM-CCD camera  
123 (**Fig. 3 B and C**). Traveling waves of *pHes7-luc* bioluminescence were observed, indicating that  
124 the segmentation clock oscillation in iPSM was successfully recapitulated, consistent with a  
125 previous report (25). Using this iPSM-based segmentation clock system, we investigated the effect  
126 of *Clock/Bmal1* expression on *Hes7*-promoter-driven oscillation. The expression of *Clock/Bmal1*  
127 genes (Dox+) resulted in defects of the oscillation in *Hes7* promoter activity, whereas *pHes7-luc*  
128 bioluminescence continued to oscillate under Dox– conditions. Oscillation of the segmentation  
129 clock was observed even during the induction of *Clock/Bmal1DN* (**Fig. 3D**), indicating that the  
130 CLOCK/BMAL1-mediated mechanism interfered with the transcriptional oscillation of *Hes7*. A  
131 traveling wave of *Hes7* promoter activity disappeared with the expression of *Clock/Bmal1* (**Fig. 3**  
132 **E and F**), and dox-dependent arrest of *pHes7-luc* traveling wave (**Fig. 3 G and H**) clearly  
133 demonstrated the CLOCK/BMAL1-mediated interference with *Hes7*-driven segmentation clock  
134 oscillation in iPSM.

135

## 136 **Interference with somitogenesis-like segmentation by induction of CLOCK/BMAL1 in** 137 **gastruloids**

138 In addition, to explore the effect of CLOCK/BMAL1 expression on somitogenesis, we  
139 established the ESC-derived embryonic organoids, gastruloids, recapitulating an embryo-like  
140 organization, including somitogenesis-like process *in vitro* (27) (**Fig. 4A**). The *pHes7-luc*  
141 bioluminescence represented a traveling wave accompanied by the formation of segment-like  
142 structures with anteroposterior polarity, in which the gastruloids were stained with stripes of a  
143 somite marker, *Uncx4.1*, by *in situ* hybridization (**Fig. 4 B–D**). Only dox treatment in control  
144 gastruloids induced no change in the *pHes7-luc* bioluminescence oscillation and somitogenesis-  
145 like process (**Fig. 4 E–G**). The dox-inducible *Clock/Bmal1* ESC line carrying *pHes7-luc* was  
146 differentiated *in vitro* into gastruloids and produced the somitogenesis-like process without dox  
147 (**Fig. 4 H–J**). In contrast, the dox-dependent induction of *Clock/Bmal1* expression in the  
148 gastruloids interrupted the *pHes7-luc* oscillation and disrupted the somitogenesis-like structures  
149 (**Fig. 4 K–M**). In gastruloids, the expression of both *Clock/Bmal1* mRNA was confirmed after the

150 addition of dox (**Fig. S5**). These results suggest that the premature expression of the circadian key  
151 transcriptional regulator CLOCK/BMAL1 critically interferes with not only *Hes7* oscillation, but  
152 also somitogenesis.

153

#### 154 **CLOCK/BMAL1-mediated interference in *Hes7* regulatory network**

155 Next, to examine the perturbation mechanisms of the segmentation clock oscillation by the  
156 circadian components CLOCK/BMAL1, we analyzed the RNA sequencing (RNA-seq) data  
157 obtained from the total RNA of iPSM colonies. We extracted 509 upregulated and 88  
158 downregulated differentially expressed genes (DEGs) after the induction of *Clock/Bmal1* gene  
159 expression in iPSM colonies (**Fig. 5A**). A KEGG pathway enrichment analysis for the DEGs  
160 revealed enrichment of the WNT, MAPK, and NOTCH signaling pathways related to *Hes7*  
161 oscillation (28) (**Fig. 5B**). Almost all other ranked pathways also included the WNT, MAPK, and  
162 NOTCH signaling pathway-related genes (**Fig. 5B**). Similarly, enrichment of the WNT, MAPK,  
163 and NOTCH signaling pathways by *Clock/Bmal1* induction was also observed in the  
164 undifferentiated ESCs (**Fig. S6 A and B**). These findings indicate that the expression of  
165 CLOCK/BMAL1 affects the *Hes7*-related signaling pathways, which interferes with the feedback  
166 loop regulating *Hes7* oscillation. Intriguingly, in addition to *Hes7* gene expression, the expressions  
167 of *Aloxe3* in iPSM and *Aloxe3* and *Vamp2* in ESCs, the other contiguous genes with *Per1*, were  
168 upregulated with the induction of *Clock/Bmal1* expression, and this result was confirmed by  
169 quantitative RT-PCR (qPCR) (**Fig. 5 C–E, Fig. S6 C–E**) suggesting that forced expression of  
170 CLOCK/BMAL1 also affects a wide region around the *Hes7* gene locus on the same chromosome.  
171 These results suggest that the premature expression of the circadian components CLOCK/BMAL1  
172 interfered with *Hes7* oscillation and somitogenesis by perturbing the *Hes7* expressions through  
173 indirect regulatory pathways (**Fig. 5F**). Because the loss of the *Hes7* ultradian expression rhythm  
174 in the mouse cause segmentation defects (22, 29), the oscillatory expression of *Hes7* is essential  
175 for mammalian development. Therefore, the results in this study suggest that it may be imperative  
176 that CLOCK/BMAL1 function is suppressed until the completion of segmentation and other  
177 related developmental events.

178

#### 179 **Discussion**

180 Our present study showed that premature expression of circadian key components  
181 CLOCK/BMAL1 severely interferes with the ultradian rhythm of the segmentation clock in iPSM  
182 and gastruloids.

183 We have previously reported that during the early to mid-developmental stage, there are  
184 multiple molecular mechanisms that underlie the strict suppression of circadian TTFLs, such as  
185 the post-transcriptional suppression of CLOCK protein (17, 18) and the exclusive cytoplasmic  
186 localization of PER proteins (16). Furthermore, we have also reported that the maternal circadian  
187 clock cannot entrain the fetus until the establishment of the fetal circadian clock itself (17). These  
188 results suggest that the circadian rhythm in mammalian embryos is rigorously suppressed by the  
189 multilayered inhibitory mechanisms during the early to mid-developmental stage. During the  
190 multilayered suppression of circadian clock oscillation, the ultradian temporal oscillation of *Hes7*  
191 expression, segmentation clock, proceeds and forms the spatial repetitive structure of somites.

192 In the present study, we investigated the effect of the CLOCK/BMAL1-mediated activation  
193 of *Per1* transcription on the segmentation clock oscillation by using the iPSM differentiated from  
194 ESCs. It was suggested that, similar to the undifferentiated ESCs, circadian clock oscillation is  
195 suppressed in the iPSM by the common mechanisms to the ESCs and early embryos (see **Fig. S2**).  
196 Recently, it was reported that hundreds of genes including *Per1* also oscillates in the same phase  
197 as *Hes7* ultradian rhythm in *in vitro*-PSM of both mouse and humans (30), suggesting that *Per1* is  
198 deviated and free from the circadian gene regulatory mechanism of TTFL. These findings are  
199 consistent with the previously reported observations indicating that the multilayered inhibitory  
200 mechanisms including post-transcriptional inhibition of CLOCK and the predominant cytoplasmic  
201 accumulation of PER1 do not allow the oscillation of circadian TTFL (17, 18). Interestingly,  
202 although the expression of BMAL1 protein was observed even in ESCs (17), the dox-induced  
203 CLOCK sole expression in ESCs resulted in the only partial upregulation of E-box driven circadian  
204 clock genes (**Fig. S3**), raising the possibility that the endogenously expressed BMAL1 might be  
205 post-translationally modified to not function. Therefore, in this study, we used ESC lines carrying  
206 both the dox-inducible *Clock* and *Bmal1* genes as a model system of premature expression of  
207 CLOCK/BMAL1 (see **Fig. 1C**).

208 We demonstrated that the expression of CLOCK/BMAL1 affected the WNT, MAPK, and  
209 NOTCH signaling pathways related to *Hes7* oscillation in iPSM (see **Fig. 5 A and B**). In addition,  
210 the premature expression of CLOCK/BMAL1 resulted in not only the up-regulation of *Per1*  
211 expression but also the expressions of *Hes7*, *Aloxe3*, and *Vamp2*, localized adjacently on the *Per1*  
212 genomic locus (see **Fig. 2 A and B, Fig. 5 C–E, Fig. S6 C–E**). In the iPSM, the up-regulation of  
213 these gene expressions has already been induced after the 2-hour dox treatment (see **Fig. 2 A and**

214 **B, Fig. 5 C–E).** Considering that the *Per1* promoter harbors E-box elements with which  
215 CLOCK/BMAL1 heterodimer has a much higher affinity than the other genomic region (31), the  
216 immediate up-regulation of genes near *Per1* gene locus after the induction of CLOCK/BMAL1  
217 expressions could be caused by the ripple effect (32). On the other hand, the bioluminescence from  
218 *Hes7*-promoter driven luciferase reporters in the iPSMs not only lost cycling but also decreased  
219 signal intensity in approximately 2 hours after the dox addition (see Fig. 3D), indicating that the  
220 expression of CLOCK/BMAL1 in the iPSM has also inhibitory effects on the *Hes7* gene  
221 expressions. Among components involved in the *Hes7*-regulatory signaling pathways, expression  
222 of CLOCK/BMAL1 induced some negative regulators, such as the *Dusp* phosphatase family (33)  
223 in the MAPK signaling pathway, *Sfrp* in the WNT signaling pathway (34), and *Lfng* in the NOTCH  
224 signaling pathway (35) (see Fig. 5B). Therefore, the premature expression of CLOCK/BMAL1  
225 first may upregulate *Hes7* transcription and induce subsequent downregulation of *Hes7* gene  
226 expression by the induction of the negative regulators in addition to the HES7 autoinhibition.  
227 Consequently, the premature expression of the circadian components CLOCK/BMAL1 interfered  
228 with *Hes7* oscillation by perturbing the *Hes7* expression through various pathways.

229 In this study, we used a mouse embryonic organoid, gastruloids, as an *in vitro* recapitulation  
230 model of somitogenesis-like process (27). The premature expression of CLOCK/BMAL1 in the  
231 gastruloids disrupted not only the *Hes7* oscillation but also the striped structure of the somite  
232 marker, *Uncx4.1* (see Fig. 4M). Because the RNA-seq analysis data showed that hundreds of genes  
233 were affected by the induction of CLOCK/BMAL1 (see Fig. 5A), the possibility cannot be denied  
234 that the premature expression of CLOCK/BMAL1 affects cell fates or characters. However, the  
235 posterior structure in the gastruloids was held even after the induction of CLOCK/BMAL1 and  
236 then continued to extend, concomitant with the decrease of *Hes7* bioluminescence signals and the  
237 arrest of the *Hes7* oscillation (see Fig. 4K), suggesting that the premature expression of  
238 CLOCK/BMAL1 interfered with the somitogenesis process by perturbing *Hes7* oscillation of the  
239 segmentation clock.

240 *In vitro* recapitulation of embryonic process using iPSM and gastruloids has differences  
241 such as no brain tissues comparing with *in vivo* process. However, key regulators of somitogenesis  
242 we focus on in this study are expressed similarly between embryos and gastruloids using single-  
243 cell RNA sequencing and spatial transcriptomics (27), and the *in vitro* recapitulation model enables  
244 to analyze the *Hes7* oscillation in more detail using real-time imaging without maternal effects.

245 Our findings shown in this study indicated that the CLOCK/BMAL1, key components  
246 regulating the circadian TTFL, affected and interfered with the segmentation clock. Considering  
247 that transcriptional activation of CLOCK/BMAL1 is essential for the circadian regulatory



248 networks, these results suggest that the strict suppression of circadian molecular oscillatory  
249 mechanisms during the early stage embryos is inevitable for the intact developmental process in  
250 mammals. Therefore, this may be the biological and physiological significance of the delayed  
251 emergence of circadian clock oscillation and the rhythm conversion observed in mammalian  
252 development.

253

254

## 255 **Materials and Methods**

### 256 **Cell culture**

257 KY1.1 ESCs (7), referred to as ESC in the text, and *Per2<sup>Luc</sup>* ESCs (5, 36) were maintained as  
258 described previously (17). E14TG2a ESCs carrying *Hes7*-promoter-driven luciferase reporters  
259 (25), referred to as *pHes7-luc* ESCs in the text, were maintained without feeder cells in DMEM  
260 (Nacalai) supplemented with 15% fetal bovine serum (Hyclone), 2 mM L-glutamine (Nacalai), 1  
261 mM nonessential amino acids (Nacalai), 100  $\mu$ M StemSure<sup>®</sup> 2-mercaptoethanol solution (Wako),  
262 1 mM sodium pyruvate (Nacalai), 100 units/mL penicillin and streptomycin (Nacalai), 1000  
263 units/mL leukemia inhibitory factor (Wako), 3  $\mu$ M CHIRON99021 (Wako or Tocris Biosciences),  
264 and 1  $\mu$ M PD0325901 (Wako) with 5% CO<sub>2</sub> at 37°C.

265

### 266 **Transfection and establishment of cell lines**

267 ESCs stably expressing dox-inducible *Clock/Bmal1* or *Clock/Bmal1DN* (I584X) were  
268 established as described previously (17). For *TetO-Clock/Bmal1* or *TetO-Clock/Bmal1DN* ESCs,  
269 KY1.1 ESCs or *pHes7-luc* ESCs were transfected using 10.5  $\mu$ l of FuGENE 6 mixed with 1  $\mu$ g of  
270 pCAG-PBase, 1  $\mu$ g of PB-TET-Clock (17), 1  $\mu$ g of PB-TET-Bmal1 or PB-TET-Bmal1DN  
271 (I584X), 1  $\mu$ g of PB-CAG-rtTA Adv, and 0.5  $\mu$ g of puromycin selection vector. The transfected  
272 cells were grown in a culture medium supplemented with 2  $\mu$ g/mL puromycin for two days. The  
273 ESC colonies were picked and checked by qPCR after treatment with 500 ng/mL dox. For PB-  
274 TET-Bmal1 and PB-TET-Bmal1DN (I584X), Bmal1 cDNA and Bmal1DN (I584X) cDNA (26)  
275 were cloned into a PB-TET vector (37). For the *TetO-Clock Per2<sup>Luc</sup>* ESCs, *Per2<sup>Luc</sup>* ESCs were  
276 established as described previously (17).

277

## 278 **Bioluminescence imaging**

279 The iPSM colonies were differentiated from the *pHes7-luc* ESCs and *Per2<sup>Luc</sup>* ESCs as  
280 described previously (25). The *Per2<sup>Luc</sup>* ESCs were cultured without feeder cells in the ES medium  
281 containing 3  $\mu$ M CHIRON99021 and 1  $\mu$ M PD0325901 before in vitro differentiation.  
282 Bioluminescence imaging of single *pHes7-luc* iPSM colonies and *Per2<sup>Luc</sup>* iPSM colonies was  
283 performed in gelatin-coated 24-well black plates or 35-mm dishes (26). DMEM was used that was  
284 supplemented with 15% Knock-out Serum Replacement (KSR), 2 mM L-glutamine, 1 mM  
285 nonessential amino acids, 1 mM sodium pyruvate, 100 units/mL penicillin and streptomycin, 0.5%  
286 DMSO, 1  $\mu$ M CHIRON99021, and 0.1  $\mu$ M LDN193189 (Sigma) containing 1 mM luciferin and  
287 10 mM HEPES. For live imaging of single iPSM colonies using an EM-CCD camera, each iPSM  
288 colony was cultured on a fibronectin-coated glass base dish for 6 h, and images were acquired  
289 every 5 min with an exposure time of 10 sec (control) or 2.5 sec (*Clock/Bmal1* induction) under  
290 5% CO<sub>2</sub> using an LV200 Bioluminescence Imaging System (Olympus).

291 Gastruloids were generated as described in a previous report (27). In total, 200–250 live  
292 cells were plated in 40  $\mu$ l of N2B27 medium into each well of a U-bottomed nontissue culture-  
293 treated 96-well plate (Greiner 650185). After a 96-hr cultivation, the gastruloids were embedded  
294 in 10% Matrigel (Corning 356231) containing 1 mM luciferin. For live imaging of single  
295 gastruloids, the images were acquired every 5 min with an exposure time of 3.5 sec (*Clock/Bmal1*  
296 induction) or 10 sec (control) under 5% CO<sub>2</sub> using the LV200 system. The Videos were analyzed  
297 using the ImageJ software (38). Kymographs of the averaged bioluminescence intensity along the  
298 straight or segmented line of 5-pixel width were generated using the plug-in KymoResliceWide.

299

## 300 ***In situ* hybridization**

301 Hybridization chain reaction (HCR) v3 was performed as described previously (27, 39) using  
302 reagents procured from Molecular Instruments. *Uncx4.1* HCR probe (Accession NM\_013702.3,  
303 hairpin B1) was labeled with Alexa Fluor 488.

304

## 305 **Quantitative RT-PCR**

306 The iPSM colonies, ESCs, and gastruloids were washed with ice-cold PBS, and total RNA  
307 was extracted using Isogen reagent (Nippon Gene) or miRNeasy Mini Kits (QIAGEN) according  
308 to the manufacturer's instructions. To remove the feeder cells from ESCs cultured on a feeder

309 layer, the cells were treated with trypsin, and then the mixed cell populations were seeded on  
310 gelatin-coated dishes and incubated for 25 min at 37°C three times in ES cell medium. Non-  
311 attached ESCs were seeded in a gelatin-coated dish overnight and then treated with or without 500  
312 ng/mL doxycycline for 6 hr. The iPSC colonies and gastruloids were treated with or without 1000  
313 ng/mL doxycycline for 2 hr. First-strand cDNAs were synthesized with 1000 or 280 ng of total  
314 RNA using M-MLV reverse transcriptase (Invitrogen) according to the manufacturer's  
315 instructions. Quantitative PCR analysis was performed using the StepOnePlus™ Real-Time PCR  
316 system (Applied Biosystems) and iTaq™ Universal SYBR Green Supermix (Bio-Rad  
317 Laboratories). Standard PCR amplification protocols were applied, followed by dissociation-curve  
318 analysis to confirm specificity. Transcription levels were normalized to the level of  $\beta$ -actin. The  
319 following primer sequences were used:

|     |              |             |                           |
|-----|--------------|-------------|---------------------------|
| 320 | <i>Bmal1</i> | Forward (F) | CCACCTCAGAGCCATTGATACA    |
| 321 | <i>Bmal1</i> | Reverse (R) | GAGCAGGTTTAGTTCCACTTTGTCT |
| 322 | <i>Clock</i> | F           | ATTTCAGCGTTCCCATTGGA      |
| 323 | <i>Clock</i> | R           | TGCCAACAAATTTACCTCCAG     |
| 324 | <i>Per1</i>  | F           | CCCAGCTTTACCTGCAGAAG      |
| 325 | <i>Per1</i>  | R           | ATGGTTCGAAAGGAAGCCTCT     |
| 326 | <i>Per2</i>  | F           | CAGCACGCTGGCAACCTTGAAGTAT |
| 327 | <i>Per2</i>  | R           | CAGGGCTGGCTCTCACTGGACATTA |
| 328 | <i>Cry1</i>  | F           | TGAGGCAAGCAGACTGAATATTG   |
| 329 | <i>Cry1</i>  | R           | CCTCTGTACCGGGAAAGCTG      |
| 330 | <i>Cry2</i>  | F           | CTGGCGAGAAGGTAGAGTGG      |
| 331 | <i>Cry2</i>  | R           | GACGCAGAATTAGCCTTTGC      |
| 332 | <i>Dbp</i>   | F           | CGAAGAACGTCATGATGCAG      |
| 333 | <i>Dbp</i>   | R           | GGTTCCCAACATGCTAAGA       |
| 334 | <i>Hes6</i>  | F           | CAACGAGAGTCTTCAGGAGCTGCG  |
| 335 | <i>Hes6</i>  | R           | GCATGCACTGGATGTAGCCAGCAG  |

336 *Hes7* F GAGAGGACCAGGGACCAGA  
337 *Hes7* R TTCGCTCCCTCAAGTAGCC  
338 *Vamp2* F GAGCTGGATGACCGTGCAGATG  
339 *Vamp2* R ATGGCGCAGATCACTCCCAAGA  
340 *Aloxe3* F AAGCCCGCCAAGAATGTTATC  
341 *Aloxe3* R CGGTTCCCAGAGTTGTCATCC  
342 *Actb* F GGCTGTATTCCCCTCCATCG  
343 *Actb* R CCAGTTGGTAACAATGCCATGT

344

#### 345 **RNA-seq**

346 The iPSM colonies and ESCs were washed with ice-cold PBS, and total RNA was extracted  
347 using miRNeasy Mini Kits (QIAGEN) according to the manufacturer's instructions. Total RNA  
348 sequencing was conducted by Macrogen Japan on an Illumina NovaSeq 6000 with 101-bp paired-  
349 end reads. After trimming the adaptor sequences using Trimmomatic (40), the reads that mapped  
350 to ribosomal DNA (GenBank: BK000964.1) (41) were filtered out and the sequence reads were  
351 mapped to the mouse genome (GRCm38/mm10) using STAR (42), as described previously (16).  
352 To obtain reliable alignments, reads with a mapping quality of less than ten were removed using  
353 SAM tools (43). The known canonical genes from GENCODE VM23 (44) were used for  
354 annotation, and the reads mapped to the gene bodies were quantified using Homer (45). The  
355 longest transcript for each gene was used for gene-level analysis. We assumed that a gene was  
356 expressed when there were more than 20 reads mapped on average to the gene body. Differential  
357 gene expression in the RNA-seq data was determined using DESeq2 with thresholds of FDR <  
358 0.05, fold change > 1.5, and expression level cutoff > 0.1 FPKM (46). WebGestalt was used for  
359 KEGG pathway enrichment analysis (47). In the RNA-seq data using iPSM colonies, the reads  
360 mapped in the promoter (chr11:69115096-69120473) and 3' UTR (chr11:69122995-69123324)  
361 of *Hes7* were filtered out to eliminate transcripts from the *pHes7-luc* reporter transgene. The  
362 heatmaps of gene expression and KEGG pathways were generated with R using the pheatmap and  
363 pathview packages, respectively.

364

## 365 **Immunostaining**

366 The iPSM colonies were fixed in cold methanol for 15 min at room temperature. The fixed  
367 iPSM was blocked with 1% BSA or 5% skim milk overnight at 4°C and then incubated with anti-  
368 CLOCK mouse antibody (CLSP4) (48), anti-BMAL1 mouse antibody (MBL, JAPAN), anti-  
369 BMAL1 guinea pig antibody (16), or anti-PER1 rabbit antibody (AB2201, Millipore) overnight at  
370 4°C. After washing in 1% BSA, the iPSM colonies were incubated with a CF™488A-conjugated  
371 donkey anti-mouse IgG (Nacalai), Cy3-conjugated goat anti-guinea pig IgG (Jackson),  
372 DyLight™488-conjugated donkey anti-rabbit IgG (Jackson) for 2 hr at 4°C, and the nuclei were  
373 stained with TO-PRO®-3 1:1000 (Thermo Fisher Scientific, USA) for 10–20 min. The iPSM  
374 colonies were washed in 1% BSA and observed using an LSM510 or 900 confocal laser scanning  
375 microscope (Zeiss).

376

## 377 **Data availability**

378 RNA sequence data are available at the Gene Expression Omnibus. All other datasets generated in  
379 this study are available from the corresponding author upon reasonable request.

380

381

382 **Acknowledgments:** We thank the Yagita lab members for technical assistance. This work was  
383 supported in part by grants-in-aid for scientific research from the Japan Society for the Promotion  
384 of Science to Y.U. (19K06679) and K.Y. (18H02600), the Cooperative Research Program (Joint  
385 Usage/Research Center program) of the Institute for Frontier Life and Medical Sciences, Kyoto  
386 University (K.Y. and G.K.)

387

## 388 **References**

- 389 1. A. Balsalobre, F. Damiola, U. Schibler, A serum shock induces circadian gene expression  
390 in mammalian tissue culture cells. *Cell* **93**, 929-937 (1998).
- 391 2. J. S. Takahashi, Transcriptional architecture of the mammalian circadian clock. *Nat Rev*  
392 *Genet* **18**, 164-179 (2017).

- 393 3. K. Yagita, F. Tamanini, G. T. van Der Horst, H. Okamura, Molecular mechanisms of the  
394 biological clock in cultured fibroblasts. *Science* **292**, 278-281 (2001).
- 395 4. S. Yamazaki *et al.*, Resetting central and peripheral circadian oscillators in transgenic rats.  
396 *Science* **288**, 682-685 (2000).
- 397 5. S. H. Yoo *et al.*, PERIOD2::LUCIFERASE real-time reporting of circadian dynamics  
398 reveals persistent circadian oscillations in mouse peripheral tissues. *Proc Natl Acad Sci U*  
399 *S A* **101**, 5339-5346 (2004).
- 400 6. J. B. Hogenesch, H. R. Ueda, Understanding systems-level properties: timely stories from  
401 the study of clocks. *Nat Rev Genet* **12**, 407-416 (2011).
- 402 7. K. Yagita *et al.*, Development of the circadian oscillator during differentiation of mouse  
403 embryonic stem cells in vitro. *Proc Natl Acad Sci U S A* **107**, 3846-3851 (2010).
- 404 8. J. D. Alvarez, D. Chen, E. Storer, A. Sehgal, Non-cyclic and developmental stage-specific  
405 expression of circadian clock proteins during murine spermatogenesis. *Biol Reprod* **69**, 81-  
406 91 (2003).
- 407 9. T. Amano *et al.*, Expression and functional analyses of circadian genes in mouse oocytes  
408 and preimplantation embryos: Cry1 is involved in the meiotic process independently of  
409 circadian clock regulation. *Biol Reprod* **80**, 473-483 (2009).
- 410 10. E. Kowalska, E. Moriggi, C. Bauer, C. Dibner, S. A. Brown, The circadian clock starts  
411 ticking at a developmentally early stage. *J Biol Rhythms* **25**, 442-449 (2010).
- 412 11. D. Morse, N. Cermakian, S. Brancorsini, M. Parvinen, P. Sassone-Corsi, No circadian  
413 rhythms in testis: Period1 expression is clock independent and developmentally regulated  
414 in the mouse. *Mol Endocrinol* **17**, 141-151 (2003).
- 415 12. F. C. Davis, R. A. Gorski, Development of hamster circadian rhythms: role of the maternal  
416 suprachiasmatic nucleus. *J Comp Physiol A* **162**, 601-610 (1988).
- 417 13. C. Jud, U. Albrecht, Circadian rhythms in murine pups develop in absence of a functional  
418 maternal circadian clock. *J Biol Rhythms* **21**, 149-154 (2006).
- 419 14. S. M. Reppert, W. J. Schwartz, Maternal suprachiasmatic nuclei are necessary for maternal  
420 coordination of the developing circadian system. *J Neurosci* **6**, 2724-2729 (1986).

- 421 15. V. Carmona-Alcocer *et al.*, Ontogeny of Circadian Rhythms and Synchrony in the  
422 Suprachiasmatic Nucleus. *J Neurosci* **38**, 1326-1334 (2018).
- 423 16. Y. Umemura *et al.*, Transcriptional program of Kpna2/Importin-alpha2 regulates cellular  
424 differentiation-coupled circadian clock development in mammalian cells. *Proc Natl Acad*  
425 *Sci U S A* **111**, E5039-5048 (2014).
- 426 17. Y. Umemura *et al.*, Involvement of posttranscriptional regulation of Clock in the  
427 emergence of circadian clock oscillation during mouse development. *Proc Natl Acad Sci*  
428 *U S A* **114**, E7479-E7488 (2017).
- 429 18. Y. Umemura, I. Maki, Y. Tsuchiya, N. Koike, K. Yagita, Human Circadian Molecular  
430 Oscillation Development Using Induced Pluripotent Stem Cells. *J Biol Rhythms*  
431 10.1177/0748730419865436, 748730419865436 (2019).
- 432 19. Y. Harima, I. Imayoshi, H. Shimojo, T. Kobayashi, R. Kageyama, The roles and  
433 mechanism of ultradian oscillatory expression of the mouse Hes genes. *Semin Cell Dev*  
434 *Biol* **34**, 85-90 (2014).
- 435 20. A. Hubaud, O. Pourquie, Signalling dynamics in vertebrate segmentation. *Nat Rev Mol*  
436 *Cell Biol* **15**, 709-721 (2014).
- 437 21. Y. Bessho, H. Hirata, Y. Masamizu, R. Kageyama, Periodic repression by the bHLH factor  
438 Hes7 is an essential mechanism for the somite segmentation clock. *Genes Dev* **17**, 1451-  
439 1456 (2003).
- 440 22. Y. Takashima, T. Ohtsuka, A. Gonzalez, H. Miyachi, R. Kageyama, Intronic delay is  
441 essential for oscillatory expression in the segmentation clock. *Proc Natl Acad Sci U S A*  
442 **108**, 3300-3305 (2011).
- 443 23. Y. Bessho *et al.*, Dynamic expression and essential functions of Hes7 in somite  
444 segmentation. *Genes Dev* **15**, 2642-2647 (2001).
- 445 24. O. Q. H. Zinani, K. Keseroglu, A. Ay, E. M. Ozbudak, Pairing of segmentation clock genes  
446 drives robust pattern formation. *Nature* **589**, 431-436 (2021).
- 447 25. M. Matsumiya, T. Tomita, K. Yoshioka-Kobayashi, A. Isomura, R. Kageyama, ES cell-  
448 derived presomitic mesoderm-like tissues for analysis of synchronized oscillations in the  
449 segmentation clock. *Development* **145** (2018).

- 450 26. Y. B. Kiyohara *et al.*, The BMAL1 C terminus regulates the circadian transcription  
451 feedback loop. *Proc Natl Acad Sci U S A* **103**, 10074-10079 (2006).
- 452 27. S. C. van den Brink *et al.*, Single-cell and spatial transcriptomics reveal somitogenesis in  
453 gastruloids. *Nature* **582**, 405-409 (2020).
- 454 28. M. Kanehisa, S. Goto, KEGG: kyoto encyclopedia of genes and genomes. *Nucleic Acids*  
455 *Res* **28**, 27-30 (2000).
- 456 29. Y. Niwa *et al.*, The initiation and propagation of Hes7 oscillation are cooperatively  
457 regulated by Fgf and notch signaling in the somite segmentation clock. *Dev Cell* **13**, 298-  
458 304 (2007).
- 459 30. M. Matsuda *et al.*, Recapitulating the human segmentation clock with pluripotent stem  
460 cells. *Nature* **580**, 124-129 (2020).
- 461 31. N. Koike *et al.*, Transcriptional architecture and chromatin landscape of the core circadian  
462 clock in mammals. *Science* **338**, 349-354 (2012).
- 463 32. M. Ebisuya, T. Yamamoto, M. Nakajima, E. Nishida, Ripples from neighbouring  
464 transcription. *Nat Cell Biol* **10**, 1106-1113 (2008).
- 465 33. D. M. Owens, S. M. Keyse, Differential regulation of MAP kinase signalling by dual-  
466 specificity protein phosphatases. *Oncogene* **26**, 3203-3213 (2007).
- 467 34. R. T. Moon, J. D. Brown, J. A. Yang-Snyder, J. R. Miller, Structurally related receptors  
468 and antagonists compete for secreted Wnt ligands. *Cell* **88**, 725-728 (1997).
- 469 35. J. K. Dale *et al.*, Periodic notch inhibition by lunatic fringe underlies the chick  
470 segmentation clock. *Nature* **421**, 275-278 (2003).
- 471 36. Z. Chen *et al.*, Identification of diverse modulators of central and peripheral circadian  
472 clocks by high-throughput chemical screening. *Proc Natl Acad Sci U S A* **109**, 101-106  
473 (2012).
- 474 37. Y. Inada *et al.*, Cell and tissue-autonomous development of the circadian clock in mouse  
475 embryos. *FEBS Lett* **588**, 459-465 (2014).
- 476 38. C. A. Schneider, W. S. Rasband, K. W. Eliceiri, NIH Image to ImageJ: 25 years of image  
477 analysis. *Nat Methods* **9**, 671-675 (2012).



- 478 39. H. M. T. Choi *et al.*, Third-generation in situ hybridization chain reaction: multiplexed,  
479 quantitative, sensitive, versatile, robust. *Development* **145** (2018).
- 480 40. A. M. Bolger, M. Lohse, B. Usadel, Trimmomatic: a flexible trimmer for Illumina  
481 sequence data. *Bioinformatics* **30**, 2114-2120 (2014).
- 482 41. N. R. Coordinators, Database resources of the National Center for Biotechnology  
483 Information. *Nucleic Acids Res* **46**, D8-D13 (2018).
- 484 42. A. Dobin *et al.*, STAR: ultrafast universal RNA-seq aligner. *Bioinformatics* **29**, 15-21  
485 (2013).
- 486 43. H. Li *et al.*, The Sequence Alignment/Map format and SAMtools. *Bioinformatics* **25**, 2078-  
487 2079 (2009).
- 488 44. A. Frankish *et al.*, GENCODE reference annotation for the human and mouse genomes.  
489 *Nucleic Acids Res* **47**, D766-D773 (2019).
- 490 45. S. Heinz *et al.*, Simple combinations of lineage-determining transcription factors prime  
491 cis-regulatory elements required for macrophage and B cell identities. *Mol Cell* **38**, 576-  
492 589 (2010).
- 493 46. M. I. Love, W. Huber, S. Anders, Moderated estimation of fold change and dispersion for  
494 RNA-seq data with DESeq2. *Genome Biol.* **15**, 550 (2014).
- 495 47. Y. Liao, J. Wang, E. J. Jaehnig, Z. Shi, B. Zhang, WebGestalt 2019: gene set analysis  
496 toolkit with revamped UIs and APIs. *Nucleic Acids Res* **47**, W199-W205 (2019).
- 497 48. H. Yoshitane *et al.*, Roles of CLOCK phosphorylation in suppression of E-box-dependent  
498 transcription. *Mol Cell Biol* **29**, 3675-3686 (2009).
- 499

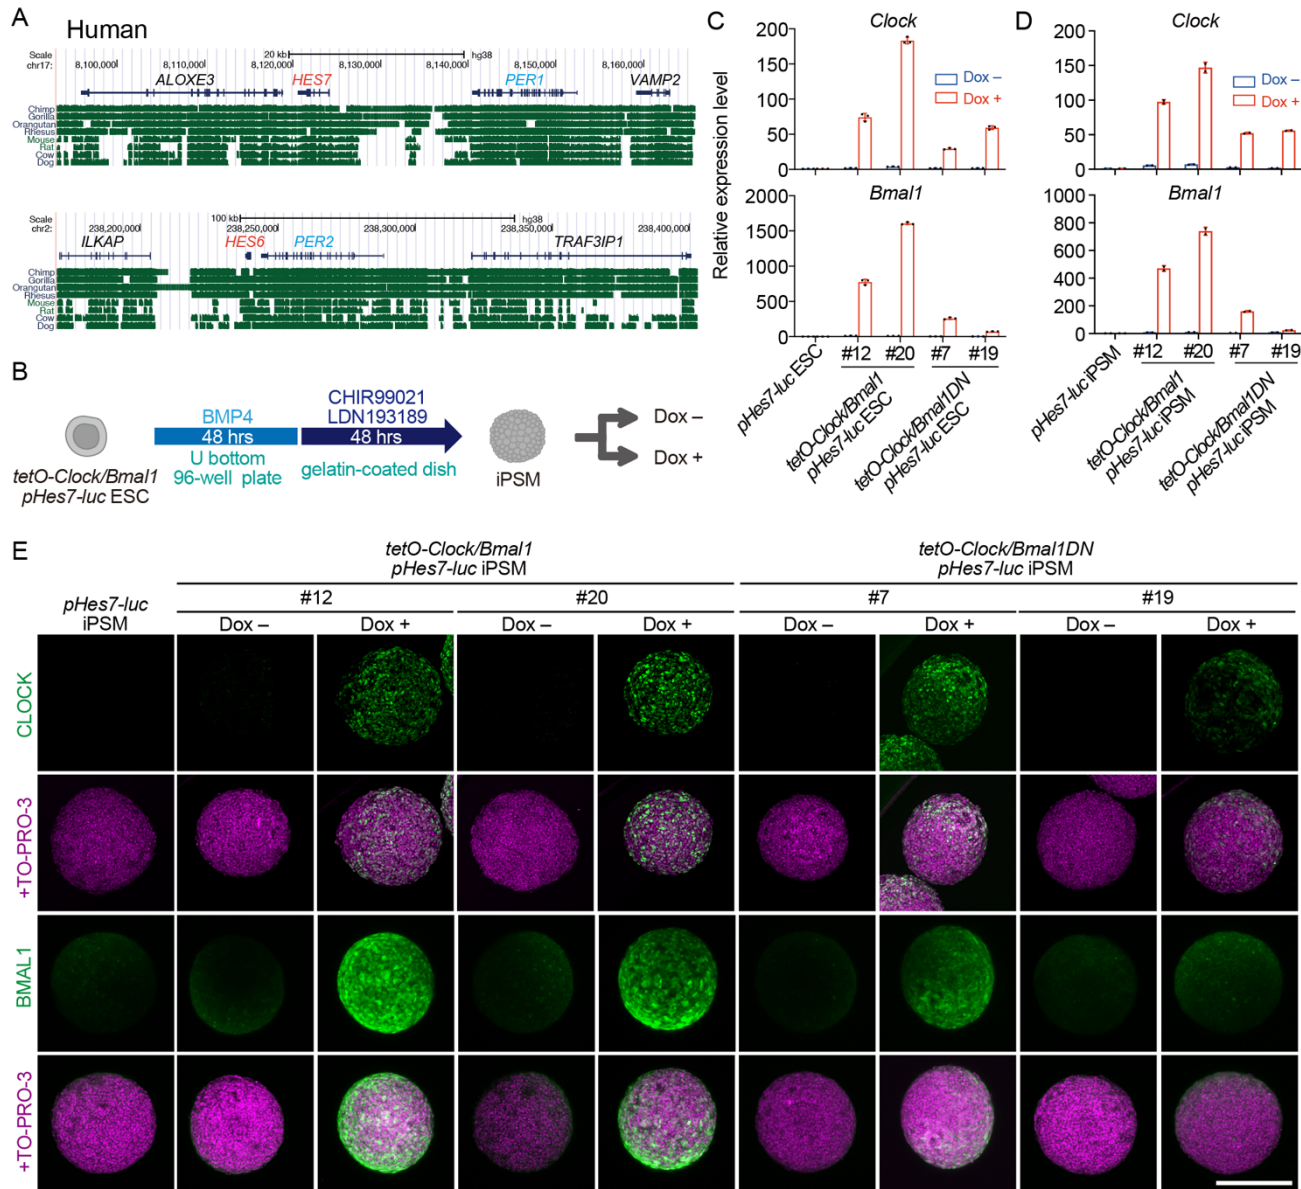

500 **Fig. 1. Establishment of ESC lines carrying both the dox-inducible *Clock* and *Bmal1* genes.**  
 501 (A) Human genomic locus of circadian clock genes, *PER1*, and the essential segmentation clock  
 502 gene, *HES7*, are highly conserved in higher vertebrates. The *PER1* homolog *PER2* is also located  
 503 adjacent to the *HES7* homolog *HES6* in the genome. (B) ESCs were differentiated into iPSM for  
 504 96 hr *in vitro*, and then the iPSM colonies were treated with or without dox. (C) qPCR of *Clock*  
 505 and *Bmal1* mRNA in the indicated ESCs. 500 ng/mL dox treatment for 6 hr (red) or not (blue).  
 506 Each number indicates clone number. Mean  $\pm$  SD (n = 3 biological replicates). (D) qPCR of *Clock*  
 507 and *Bmal1* mRNA in the indicated iPSM colonies. 1000 ng/mL dox treatment for 2 hr (red) or not  
 508 (blue). Mean  $\pm$  SD (n = 2 technical replicates). The average expression level of *pHes7-luc* ESCs  
 509 or iPSM colonies without dox was set to 1. (E) Representative maximum intensity projection of

510 the immunostaining of iPSM colonies treated with 1000 ng/mL dox for 2 hr or not. n = 2–3  
511 biological replicates. Scale = 250  $\mu$ m.

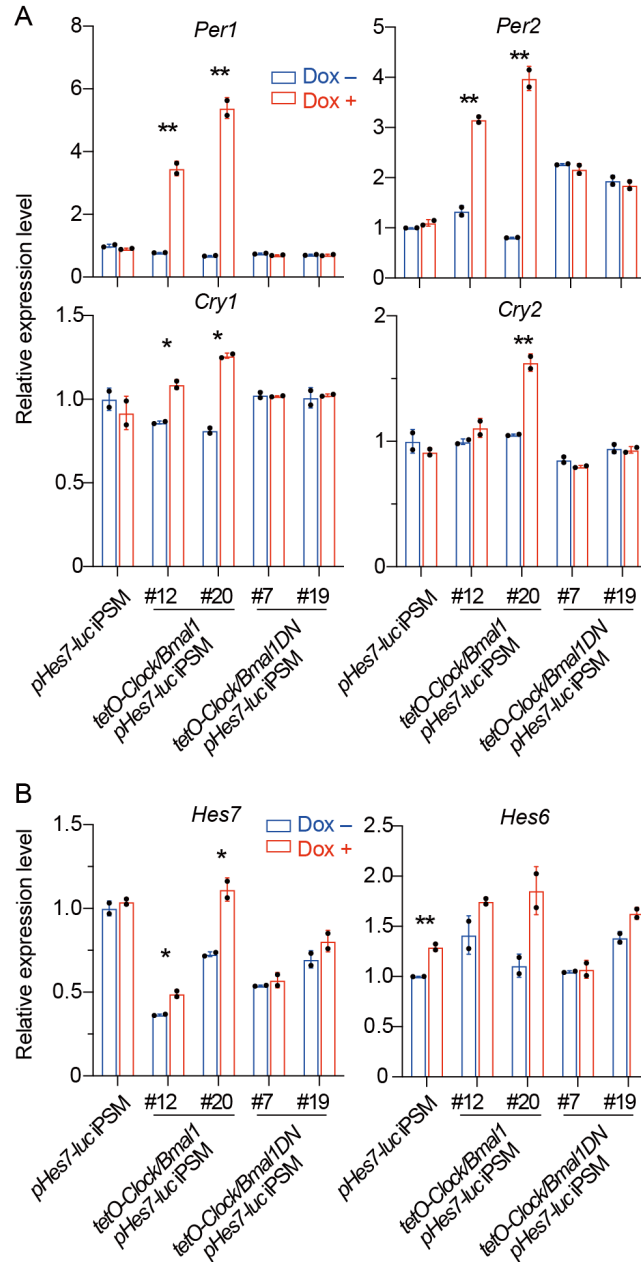

512 **Fig. 2. CLOCK/BMAL1 expressions upregulated not only circadian clock genes but also**  
513 ***Hes7* gene expressions in the iPSM. (A, B) qPCR of core circadian clock genes (A) and *Hes7* or**  
514 ***Hes6* gene (B) in the indicated iPSM colonies. 1000 ng/mL dox treatment for 2 hr (red) or not**  
515 **(blue). Mean  $\pm$  SD (n = 2 technical replicates). The average expression level of iPSM colonies**  
516 **without dox was set to 1. Two-tailed t-test, \*P < 0.05, \*\*P < 0.01.**

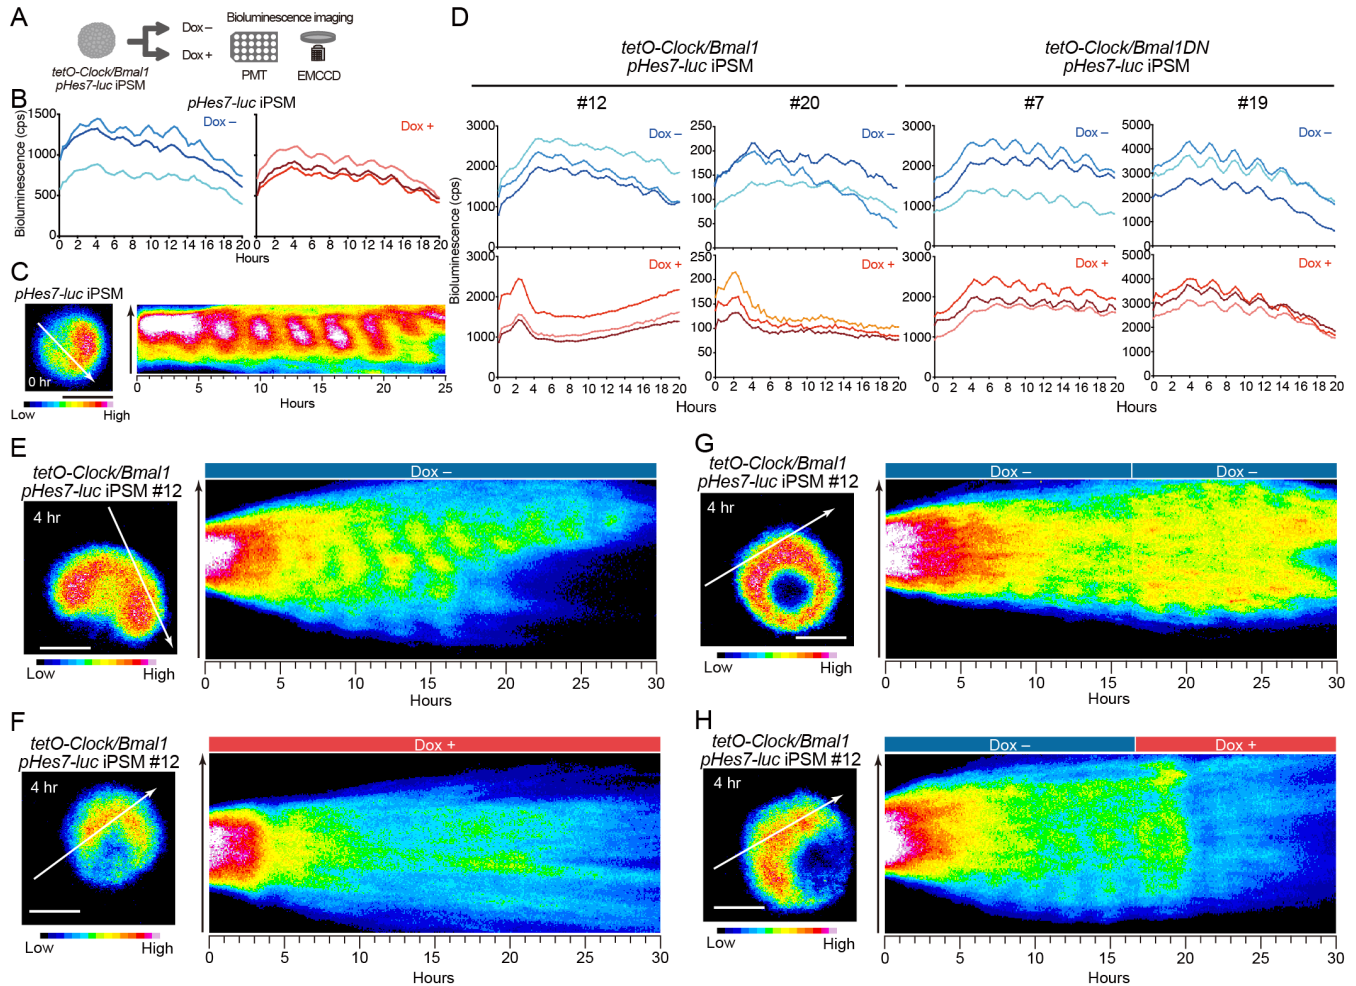

517 **Fig. 3. CLOCK/BMAL1 expressions arrested the autonomous oscillations of *Hes7* in the**  
 518 **iPSM colonies.** (A) Bioluminescence of each dox-inducible *Clock/Bmal1* or *Clock/Bmal1DN*  
 519 *pHes7-luc* iPSM colony was observed using PMT or an EM-CCD camera without or with dox. (B,  
 520 C) Representative bioluminescence traces (B, n = 25 biological replicates) and live imaging (C, n  
 521 = 3 biological replicates) of single *pHes7-luc* iPSM colony with or without dox. The kymograph  
 522 of the imaging along the arrow is shown. (D) Representative bioluminescence traces of the single  
 523 indicated iPSM colony with and without 1000 ng/mL dox. n = 10-54 biological replicates. (E–H)  
 524 Live imaging of the single *tetO-Clock/Bmal1 pHes7-luc* iPSM colony with and without dox. Dox-  
 525 containing medium or only medium was added at the indicated time points at the final dox  
 526 concentration of 1000 ng/mL (G, H). Each kymograph along the arrow is shown. Scales = 250  
 527  $\mu$ m. n = 2-4 biological replicates.

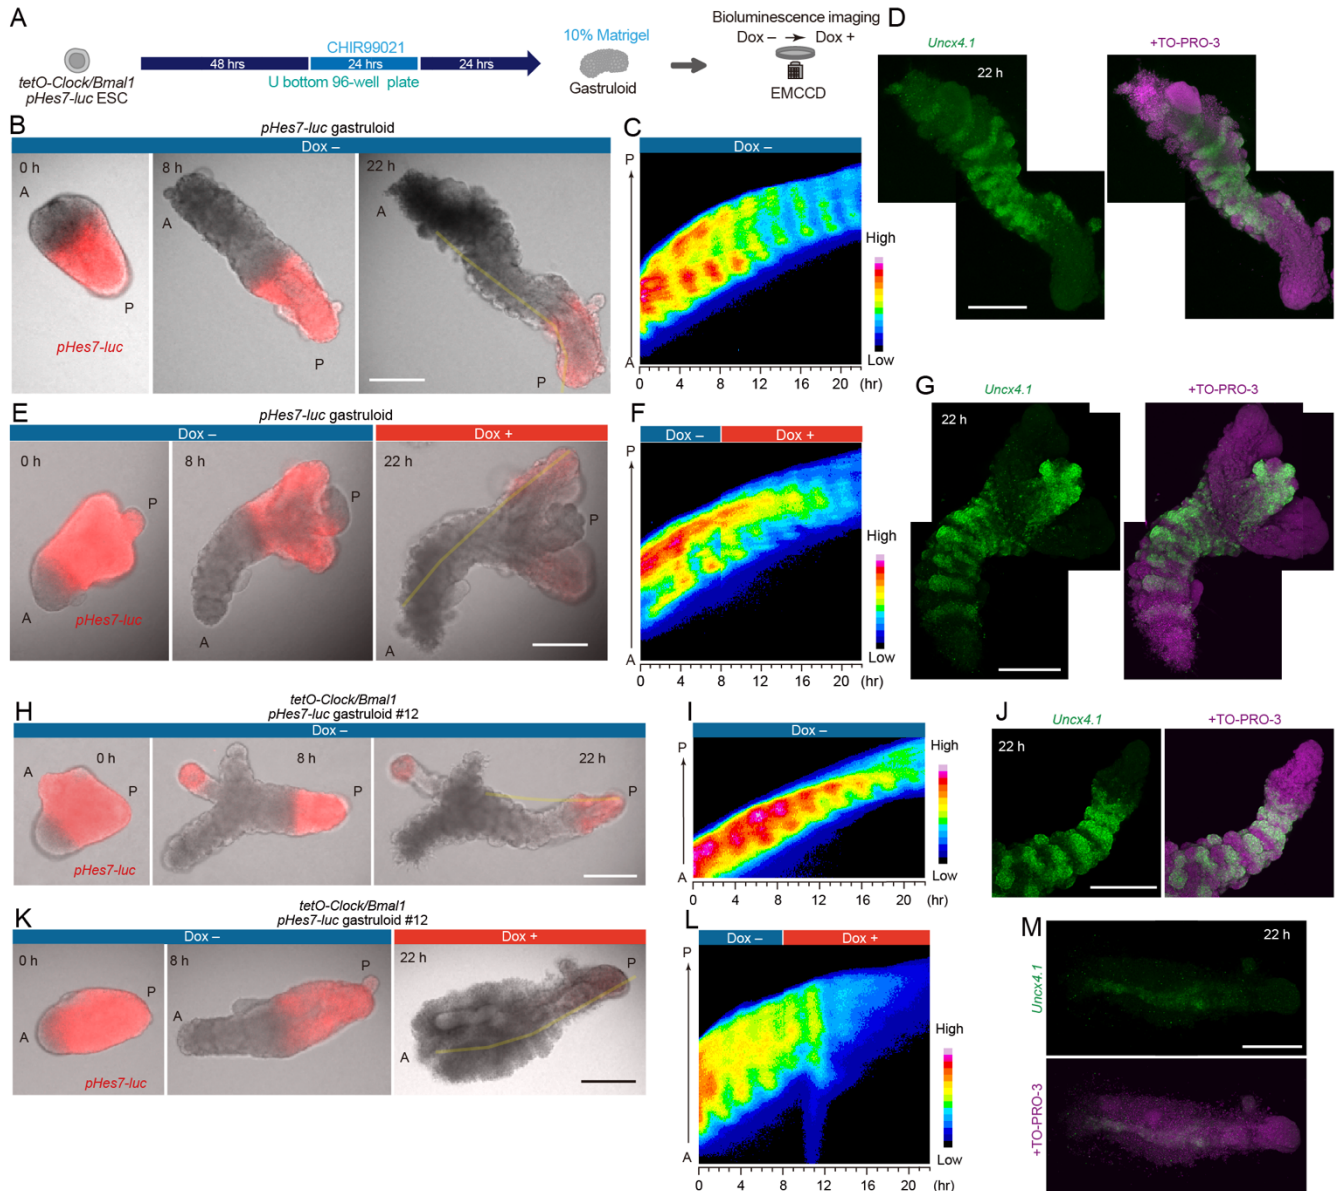

528 **Fig. 4. CLOCK/BMAL1 expressions interfered with the autonomous oscillations of *Hes7* and**  
 529 **somitogenesis-like process in the gastruloids. (A)** Dox-inducible *Clock/Bmal1 pHis7-luc* ESCs  
 530 were differentiated into gastruloids for 96 hr *in vitro*, and then the gastruloids embedded in 10%  
 531 Matrigel were treated with or without dox. *pHis7-luc* bioluminescence was observed using an EM-  
 532 CCD camera without or with dox. (B–M) Time-lapse bioluminescence (red) and bright field  
 533 imaging of the single *pHis7-luc* gastruloid or *tetO-Clock/Bmal1 pHis7-luc* gastruloid without and  
 534 with dox. Dox-containing medium was added at the indicated time points at the final dox  
 535 concentration of 1000 ng/mL (C, F, I, L). Each kymograph is shown along the yellow lines in B,  
 536 E, H, K. *In situ* hybridization of *Uncx4.1* in the gastruloids after the live cell imaging (D, G, J,  
 537 M). Scales = 250 μm. n = 2-4 biological replicates.

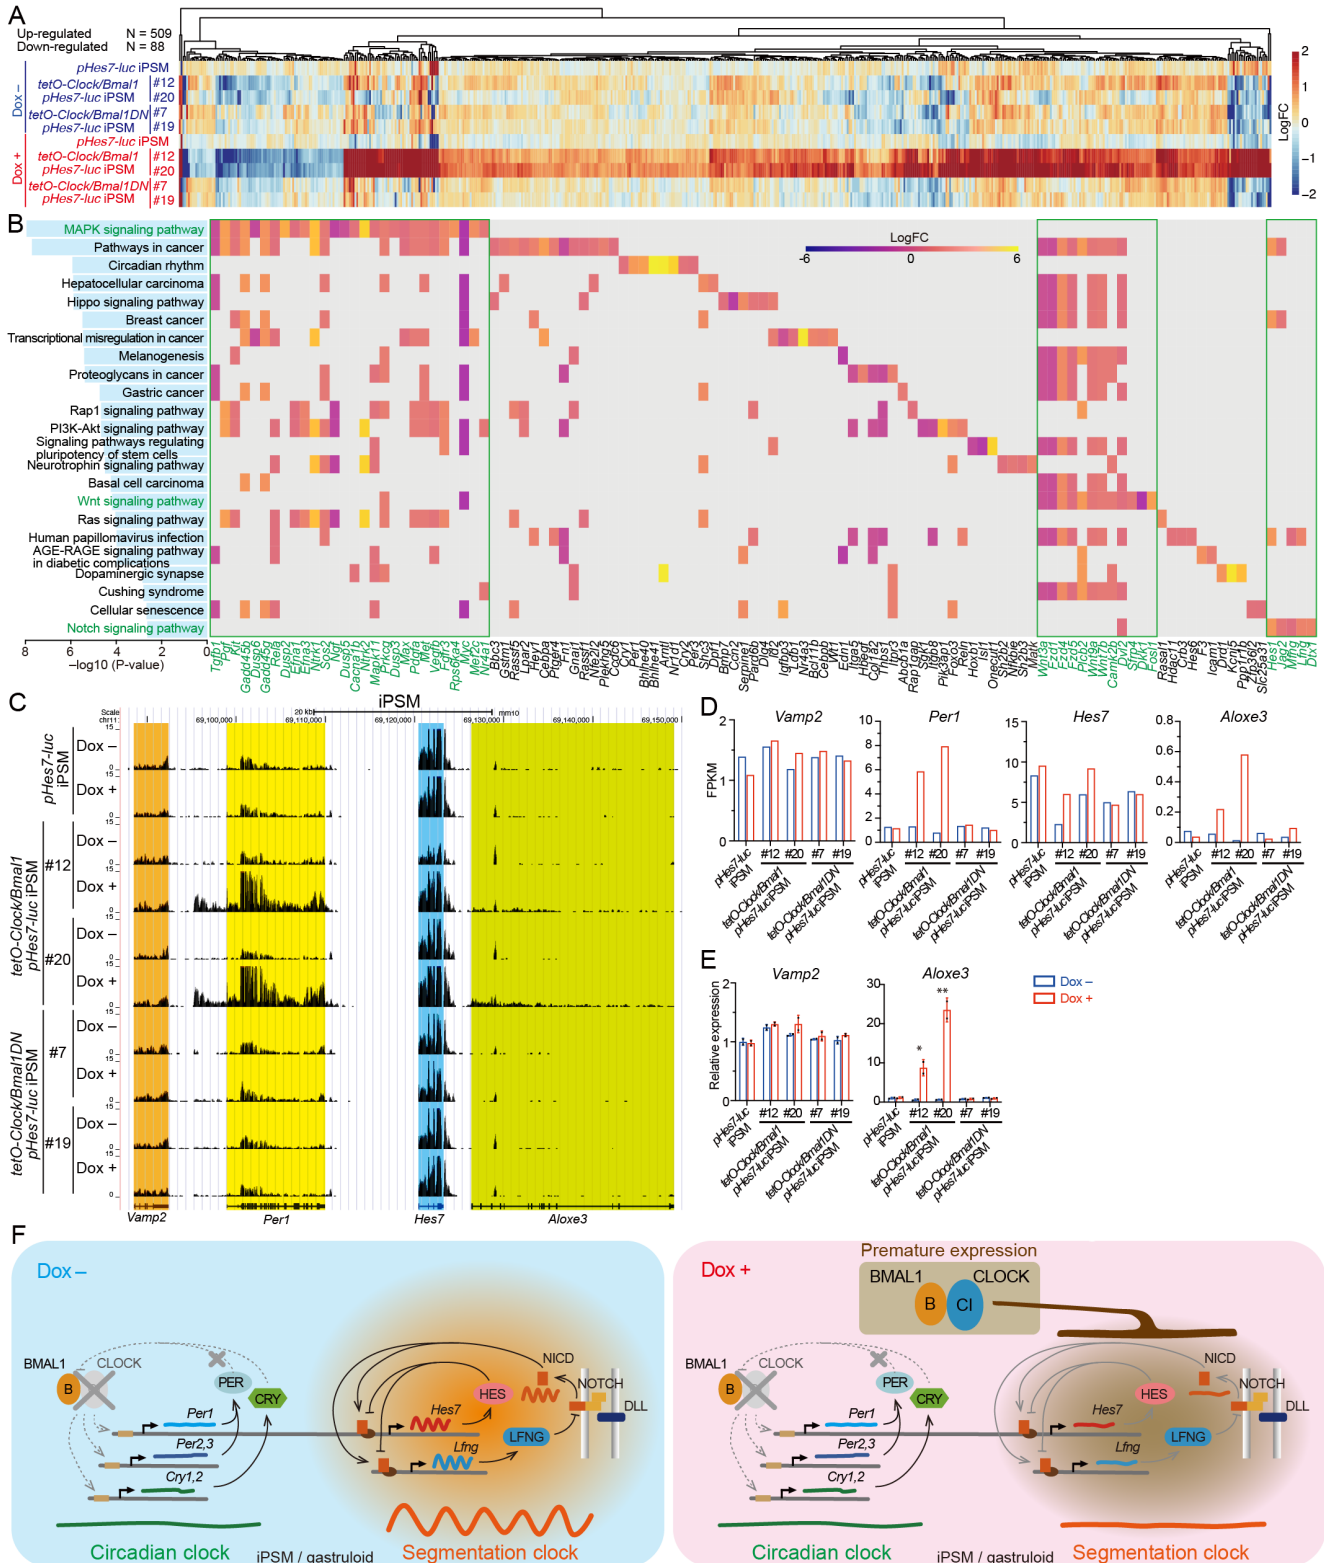

538 **Fig. 5. CLOCK/BMAL1 expressions in the iPSM colonies affected *Hes7*-related signaling**  
 539 **pathways and upregulated the expression of contiguous genes, *Per1*, *Hes7*, and *Aloxe3*.** (A)  
 540 **Upregulated and downregulated DEGs in the indicated iPSM colonies treated with dox. (B) KEGG**

541 pathway analysis of the DEGs. Each pathway was indicated with each transformed p-value. The  
542 ranked pathways contained several common genes in the WNT, MAPK, and NOTCH signaling  
543 pathways. (C) UCSC genome browser views of RNA-seq data of the contiguous genes *Vamp2*,  
544 *Per1*, *Hes7*, and *Aloxe3*. The reads shown are normalized average reads per 10 million total reads  
545 in 10-bp bins. (D) mRNA expression of *Vamp2*, *Per1*, *Hes7*, and *Aloxe3* in the indicated iPSM  
546 colonies according to RNA-seq. (E) Validation of *Vamp2* and *Aloxe3* gene expression levels in  
547 the indicated iPSM colonies using qPCR. Colored boxes indicate 1000 ng/mL dox treatment for 2  
548 hr (red) or no treatment (blue). Mean  $\pm$  SD (n = 2 technical replicates). The averaged expression  
549 level of *pHes7-luc* iPSM colonies without dox was set to 1. Two-tailed t-test, \*P < 0.05, \*\*P <  
550 0.01. (F) The premature expression of CLOCK/BMAL1 in the iPSM and gastruloids interfered  
551 with the segmentation clock oscillation and somitogenesis-like process.



1 **Supporting information for**

2

3 Circadian key component CLOCK/BMAL1 interferes with segmentation clock in  
4 mouse embryonic organoids

5

6 Yasuhiro Umemura, Nobuya Koike, Yoshiki Tsuchiya, Hitomi Watanabe, Gen Kondoh,  
7 Ryoichiro Kageyama, and Kazuhiro Yagita

8 Correspondence to: [kyagita@koto.kpu-m.ac.jp](mailto:kyagita@koto.kpu-m.ac.jp)

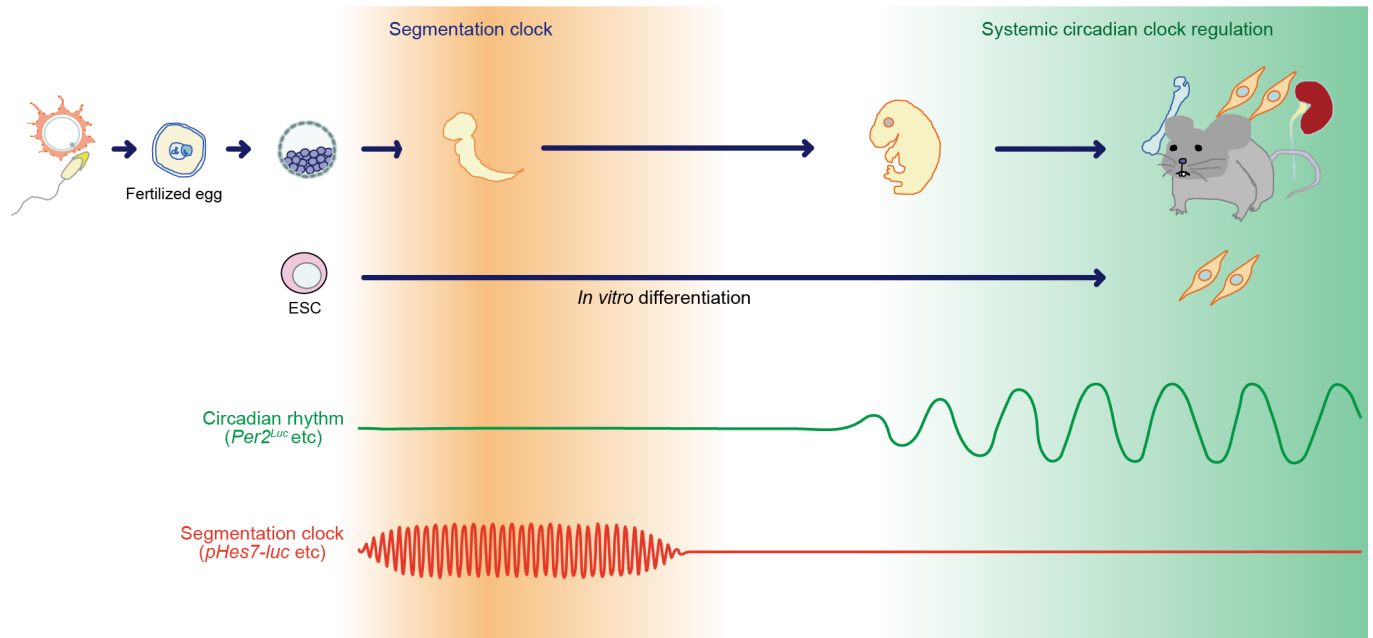

9 **Fig. S1. Mutually exclusive appearance of segmentation clock and circadian clock.** In  
10 mammals, two different types of rhythm appear sequentially during the developmental process.  
11 One is the ultradian rhythm by segmentation clock, which controls somitogenesis. The other one  
12 is the circadian oscillation, which regulates the predictive adaptation of physiological functions  
13 to the day–night environmental cycle.

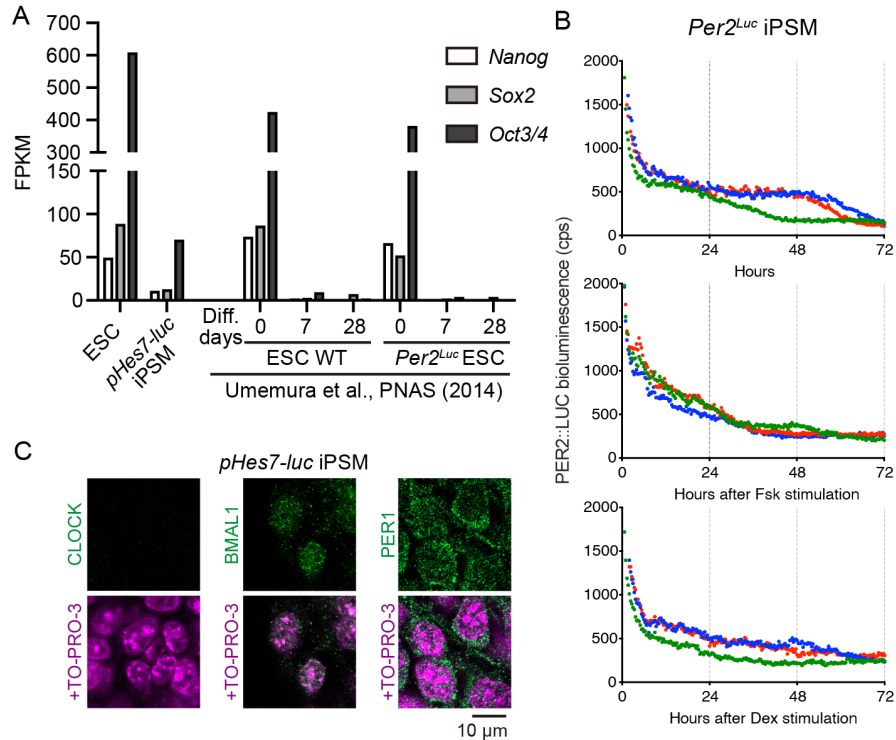

14 **Fig. S2. The iPSM has no apparent circadian clock oscillation.** (A) The expression levels of  
 15 pluripotent marker genes, *Nanog*, *Sox2*, and *Oct3/4*, were measured using RNA-seq in ESCs and  
 16 *pHes7-luc* iPSM. The data were shown with *in vitro* 0, 7-, and 28-day differentiated WT ESCs and  
 17 *Per2<sup>Luc</sup>* ESCs (GSE61184). No circadian clock oscillates in the *in vitro* 7-day differentiated ESCs  
 18 and the circadian clock oscillation starts to emerge after 14 days of differentiation culture (16, 17).  
 19 (B) Bioluminescence traces of the iPSM differentiated from *Per2<sup>Luc</sup>* ESCs. The iPSM was  
 20 stimulated with 10  $\mu$ M forskolin (Fsk, middle) or 100 nM dexamethasone (Dex, bottom).  $n = 3$   
 21 biological replicates. (C) Representative immunostaining of CLOCK, BMAL1, and PER1 in the  
 22 iPSM. The immunostaining represented the suppression of CLOCK proteins in contrast to the  
 23 expression of BMAL1. Furthermore, although the nuclei indicated the quite faint signals, PER1  
 24 protein in the iPSM is still predominantly accumulated in the cytoplasm.

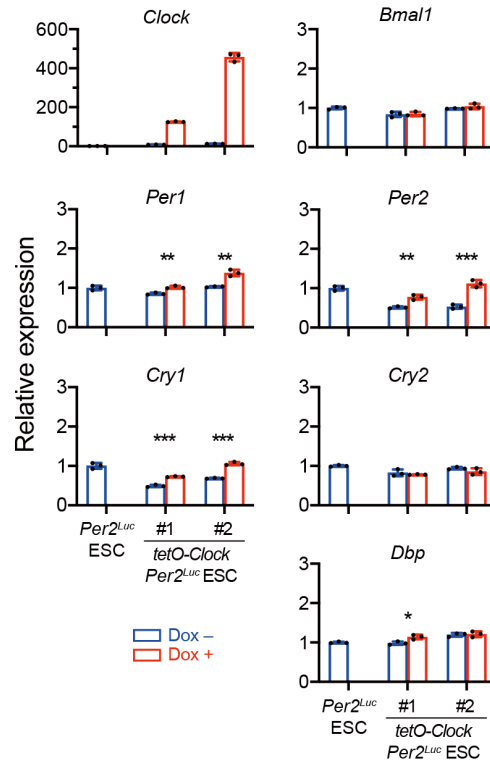

25 **Fig. S3. The core circadian clock gene expressions in the ESCs harboring dox-inducible *Clock*.**

26 Although the expression of BMAL1 protein was observed even in ESCs (17), dox-dependent sole  
 27 expression of *Clock* was insufficient for the E-box-driven expression of clock genes such as *Per1/2*  
 28 and *Cry1/2* in undifferentiated ESCs, raising the possibility that the endogenously expressed  
 29 BMAL1 might be post-translationally modified to not function. Colored boxes indicate 500 ng/mL  
 30 dox treatment for 6 hr (red) or no treatment (blue). Each number indicates clone number. Mean  $\pm$   
 31 SD (n = 3 biological replicates). The averaged expression level of *Per2<sup>Luc</sup>* ESCs without dox was  
 32 set to 1. Two-tailed t-test, \*P < 0.05, \*\*P < 0.01, \*\*\*P < 0.001.

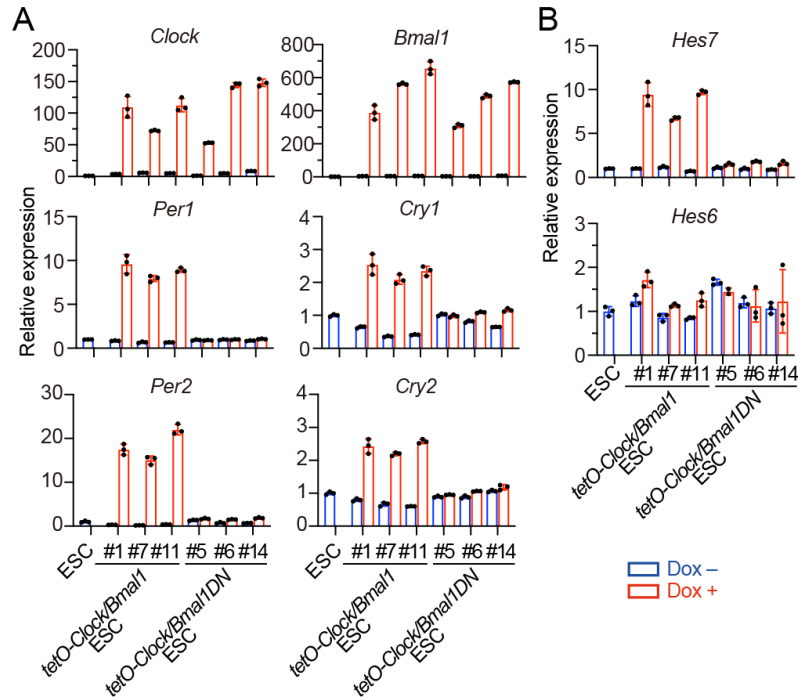

33 **Fig. S4. *Clock/Bmal1* gene expressions in ESCs upregulated not only circadian clock genes**  
34 **but also *Hes7* gene expression. (A, B) qPCR of core circadian clock gene (A) and *Hes7* or *Hes6***  
35 **gene (B) expression in ESCs harboring dox-inducible *Clock* and *Bmal1* or *Clock* and *Bmal1DN*.**  
36 Colored boxes indicate the presence (red) or absence (blue) of 500 ng/mL dox treatment for 6 hr.  
37 Each number indicates clone number. Mean  $\pm$  SD (n = 2–3 biological replicates). The average  
38 expression level of ESCs without dox was set to 1.

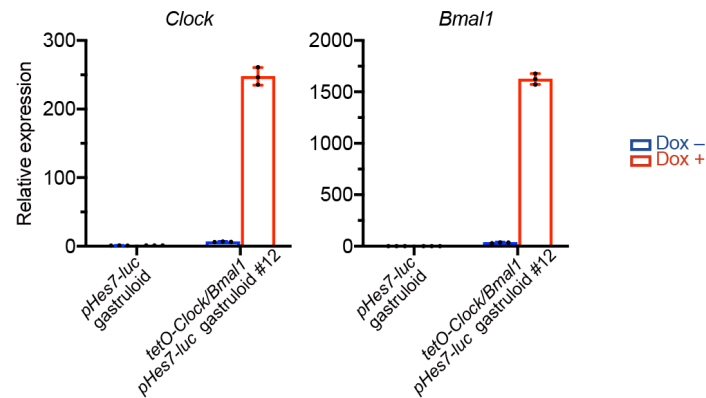

39 **Fig. S5. qPCR of *Clock* and *Bmal1* mRNA in the indicated gastruloids.** Colored boxes indicate  
40 1000 ng/mL dox treatment for 2 hr (red) or no treatment (blue). Each number indicates clone  
41 number. Mean  $\pm$  SD (n = 3 biological replicates). The average expression level of *pHes7-luc*  
42 gastruloids without dox was set to 1.



52 and *Alox3* in the indicated ESCs by qPCR. Colored boxes indicate the use of 500 ng/mL dox  
53 treatment for 6 hr (red) or untreated cells (blue). Each number indicates clone number. Mean  $\pm$  SD  
54 (n = 3 biological replicates). Two-tailed t-test, \*P < 0.05, \*\*P < 0.01, \*\*\*P < 0.001, \*\*\*\*P <  
55 0.0001, \*\*\*\*\*P < 0.00001.
